# Supplementary material
Source: PubMed Central journal article supplement (PMC7263450)

**Note to readers with disabilities:** *EHP* strives to ensure that all journal content is accessible to all readers. However, some figures and Supplemental Material published in *EHP* articles may not conform to [508 standards](#) due to the complexity of the information being presented. If you need assistance accessing journal content, please contact [ehp508@niehs.nih.gov](mailto:ehp508@niehs.nih.gov). Our staff will work with you to assess and meet your accessibility needs within 3 working days.

### **Supplemental Material**

#### **Road Traffic Noise Exposure and Filled Prescriptions for Antihypertensive Medication: A Danish Cohort Study**

Jesse D. Thacher, Aslak H. Poulsen, Nina Roswall, Ulla Hvidtfeldt, Ole Raaschou-Nielsen, Steen Solvang Jensen, Matthias Ketzel, Jørgen Brandt, Kim Overvad, Anne Tjønneland, Thomas Münzel, and Mette Sørensen

#### **Table of Contents**

**Figure S1.** Graphical evaluation of estimated exposure-response curves (solid lines) with 95% confidence intervals (dashed lines) for exposures and selected covariates.

**Figure S2.** Study Population.

**Table S1.** Correlation matrix of road traffic noise and air pollution.

**Table S2.** Associations between residential exposure to traffic noise (per 10 dB) and filled prescriptions for antihypertensive medication (excluding diuretics).

**Table S3.** Associations between residential exposure to traffic noise (per 10 dB) and filled prescriptions for antihypertensive medication adjusted for air pollution.

**Table S4.** Association between categories of exposure to road traffic ( $L_{den}$ ) at the most exposed façade and filled prescription for antihypertensive medication.

**Table S5.** Association between categories of exposure to road traffic ( $L_{den}$ ) at the least exposed façade and filled prescriptions for antihypertensive medication.

**Figure S3.** Distribution of residential exposure to road traffic ( $L_{den}$ ) at baseline.

**Figure S1.** Graphical evaluation of estimated exposure-response curves (solid lines) with 95% confidence intervals (dashed lines) for exposures and selected covariates.

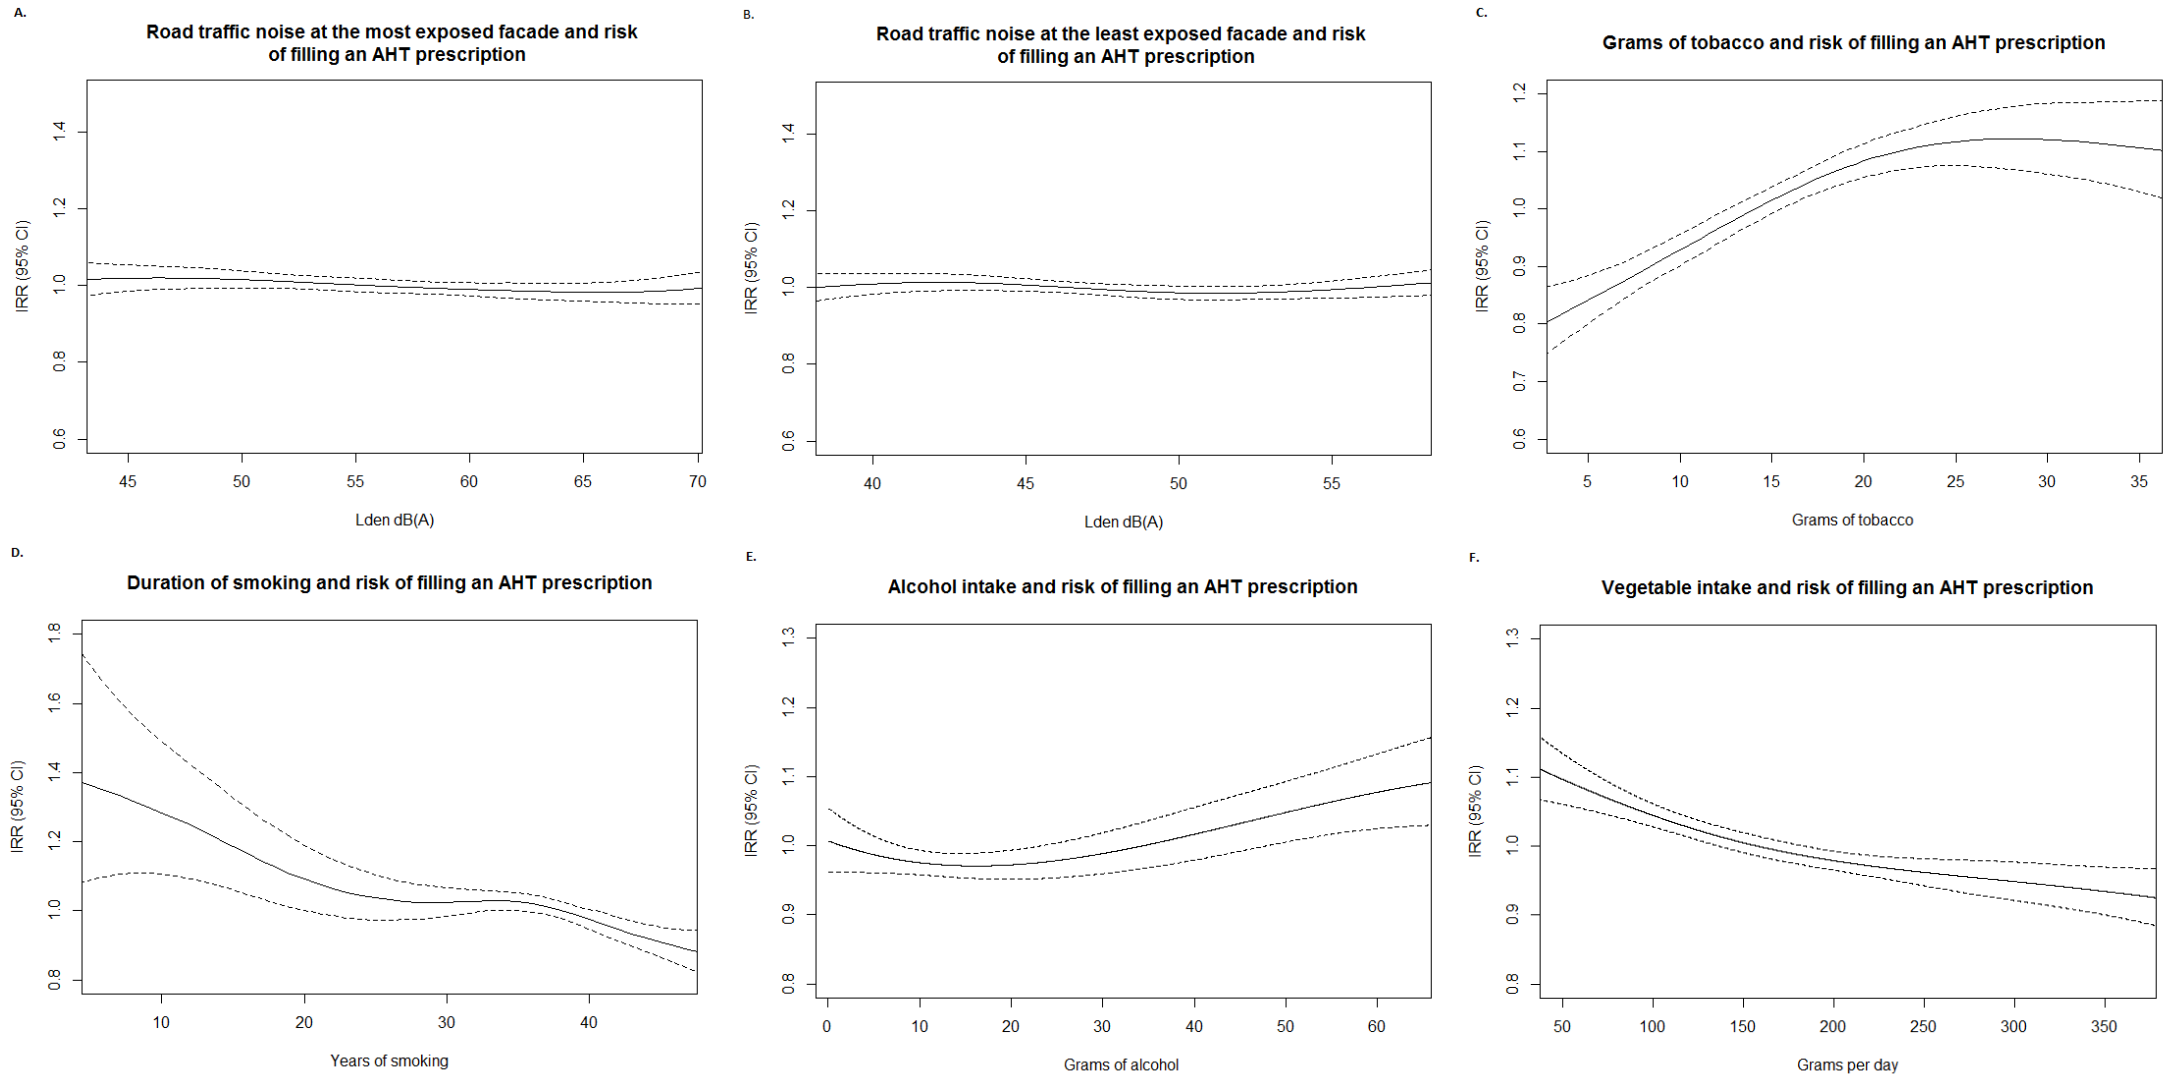

**Figure S1. Continued.**

G.

**Fruit intake and risk of filling an AHT prescription**

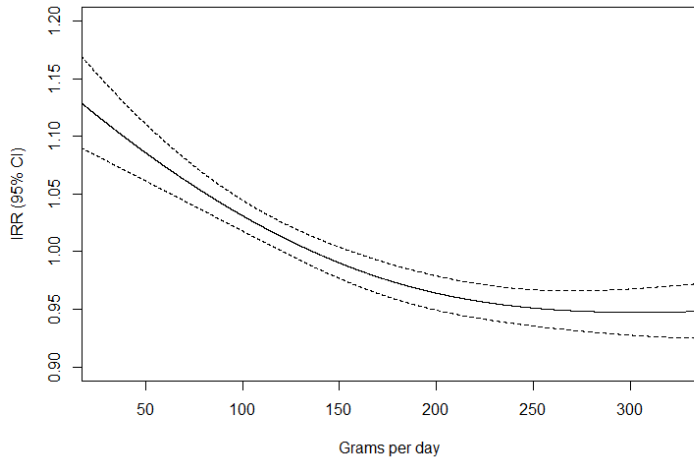

H.

**BMI and risk of filling an AHT prescription**

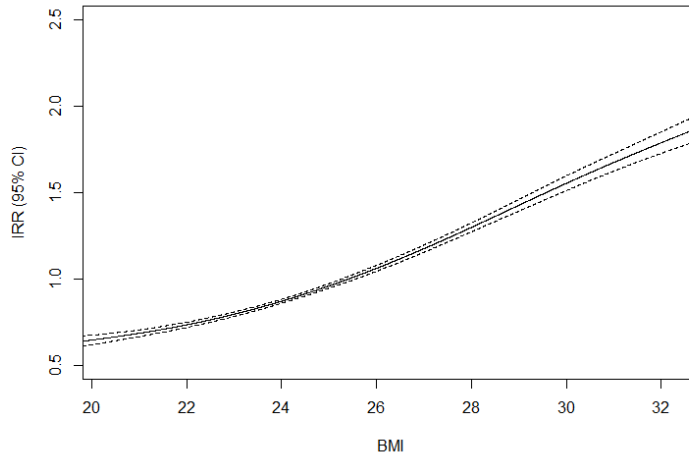

I.

**Duration of physical activity and risk of filling an AHT prescription**

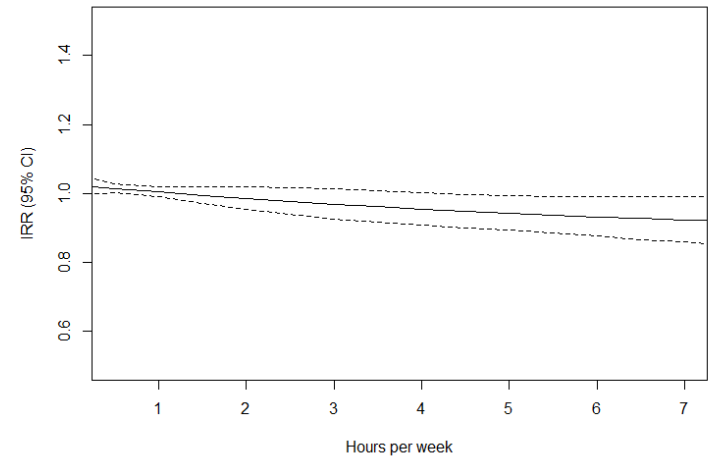

J.

**Parish level proportion of low income and risk of filling an AHT prescription**

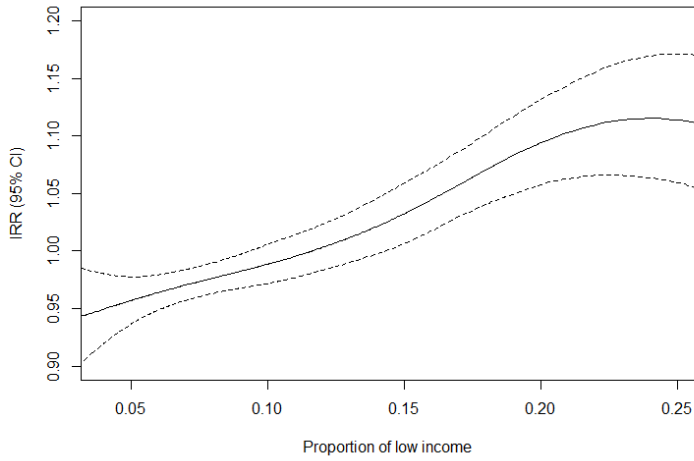

K.

**Parish level proportion of low education and risk of filling an AHT prescription**

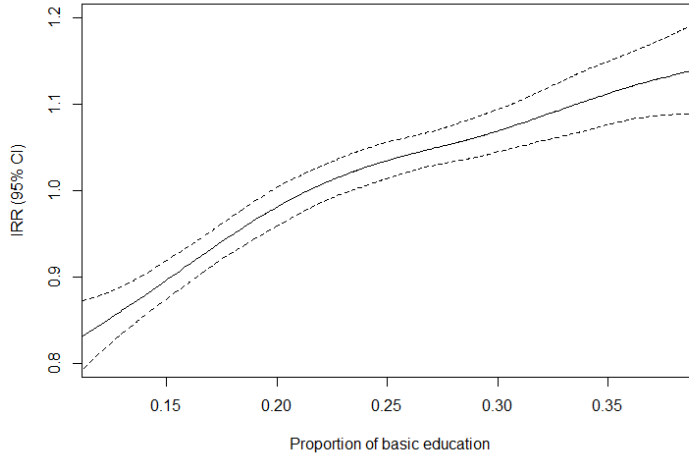

L.

**Parish level proportion of unemployed and risk of filling an AHT prescription**

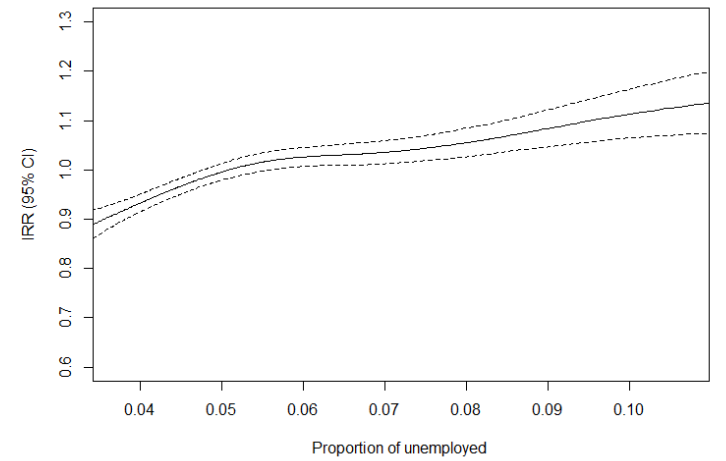

**Figure S1. Continued.**

M.

**PM2.5 exposure and risk of filling an AHT prescription**

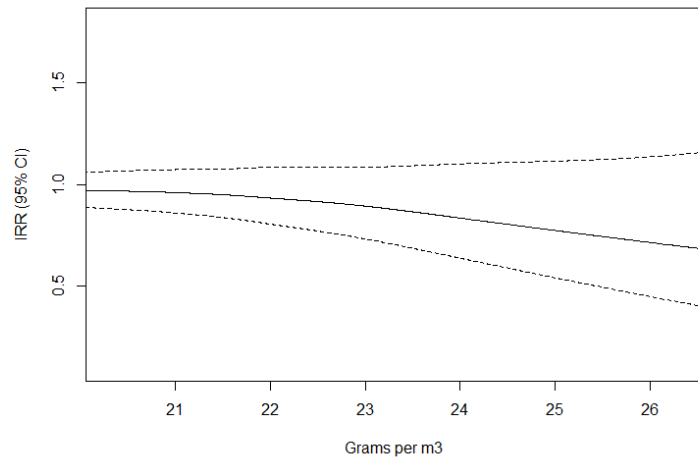

N.

**NO2 exposure and risk of filling an AHT prescription**

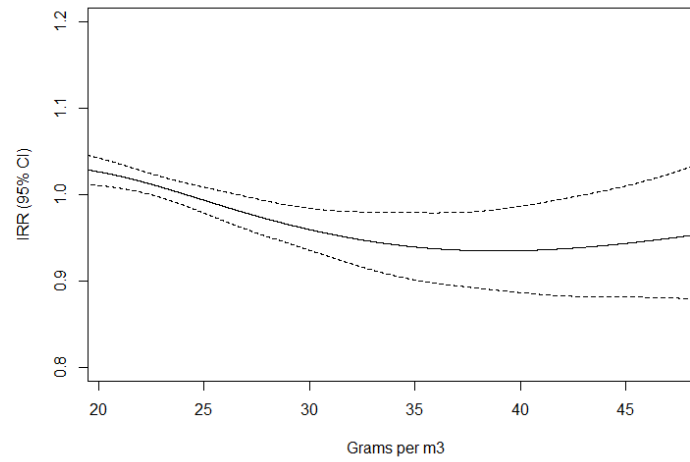

Figure S2.

## Study population

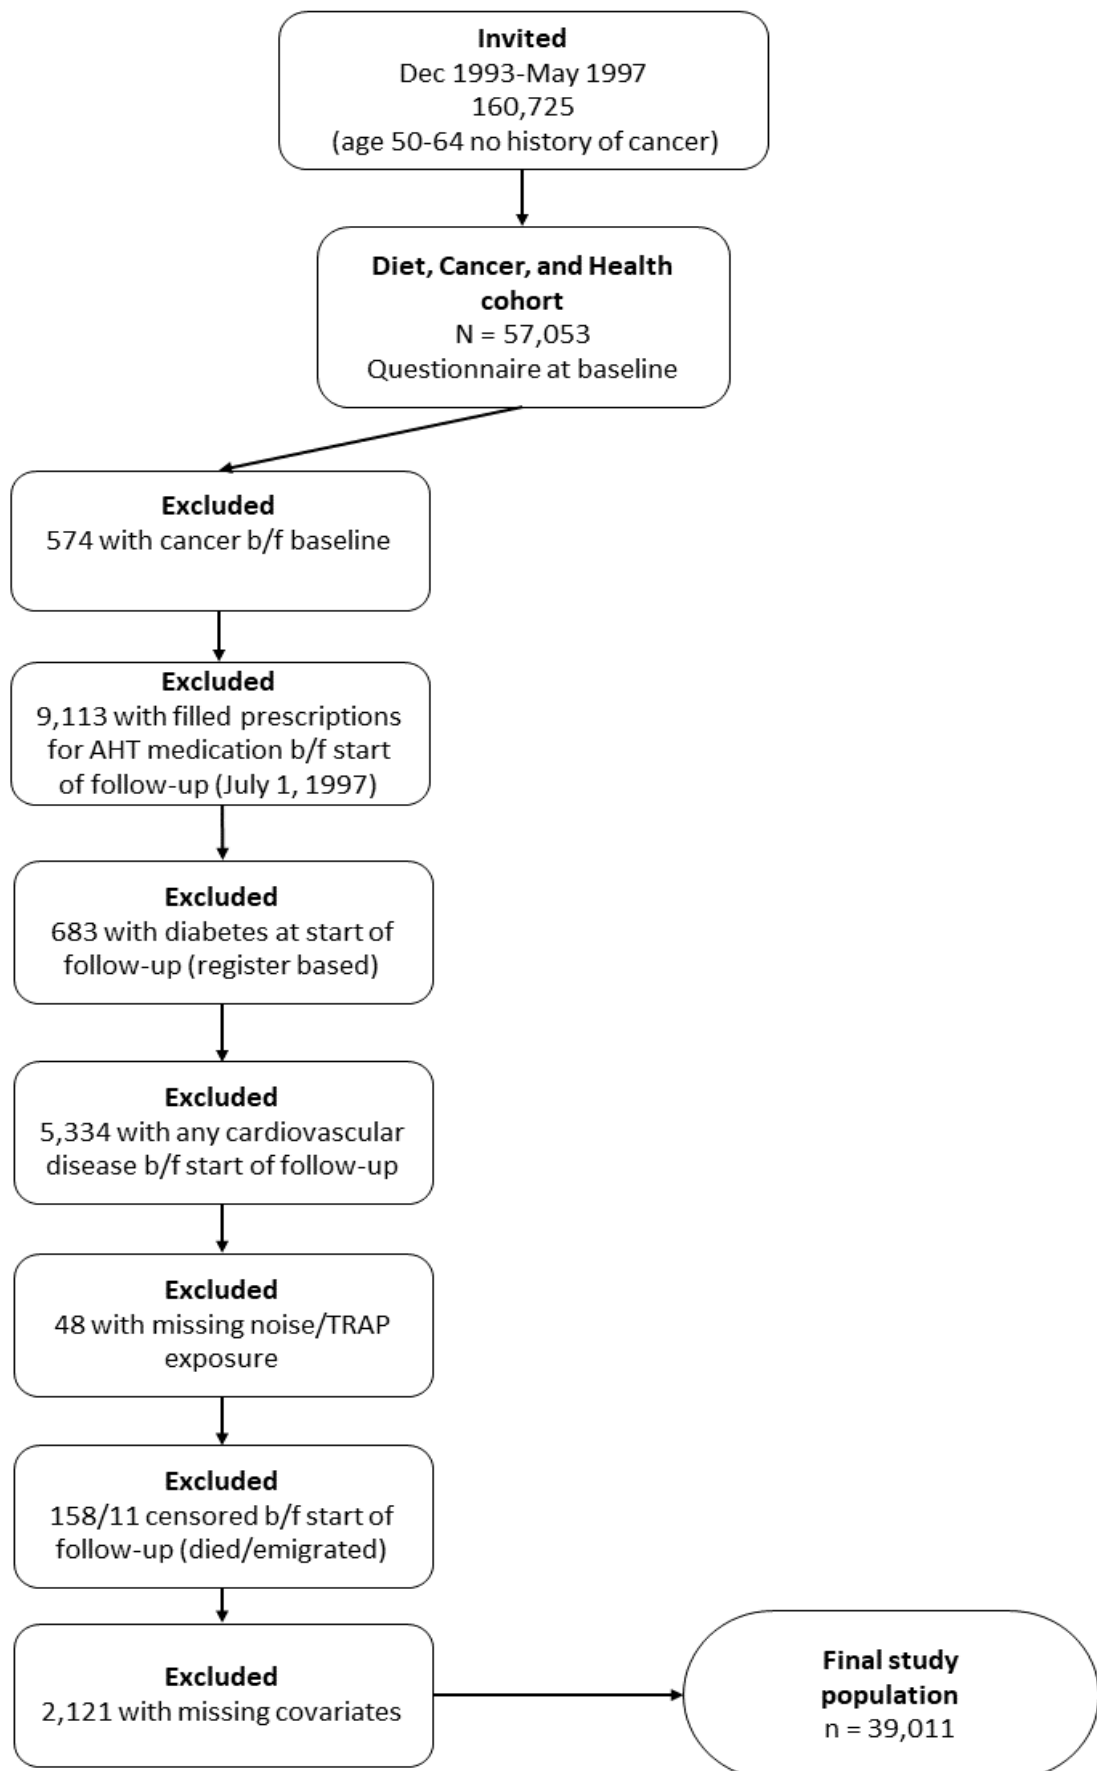

**Table S1.** Correlation matrix of road traffic noise and air pollution.<sup>a</sup>

|                                                 | <b>Road traffic noise,<br/>most exposed façade</b> | <b>Road traffic noise,<br/>least exposed façade</b> | <b>PM<sub>2.5</sub></b> | <b>NO<sub>2</sub></b> |
|-------------------------------------------------|----------------------------------------------------|-----------------------------------------------------|-------------------------|-----------------------|
| <b>Road traffic noise, most exposed façade</b>  | x                                                  | 0.45                                                | 0.55                    | 0.61                  |
| <b>Road traffic noise, least exposed façade</b> | 0.45                                               | x                                                   | 0.30                    | 0.41                  |
| <b>PM<sub>2.5</sub></b>                         | 0.55                                               | 0.30                                                | x                       | 0.82                  |
| <b>NO<sub>2</sub></b>                           | 0.61                                               | 0.41                                                | 0.82                    | x                     |

<sup>a</sup> Spearman correlation.

**Table S2.** Associations between residential exposure to traffic noise (per 10 dB) and filled prescriptions for antihypertensive medication (excluding diuretics).

| Exposure to road traffic noise (per 10 dB) | Cases  | Model 1a <sup>a</sup> | Model 1b <sup>b</sup> | Model 1c <sup>c</sup> |
|--------------------------------------------|--------|-----------------------|-----------------------|-----------------------|
|                                            |        | (Crude)               |                       |                       |
|                                            |        | IRR (95% CI)          | IRR (95% CI)          | IRR (95% CI)          |
| <b>Most exposed façade</b>                 |        |                       |                       |                       |
| 1-year preceding filled prescription       | 18,535 | 1.015 (0.996-1.035)   | 0.996 (0.976-1.016)   | 0.990 (0.971-1.010)   |
| 5-year preceding filled prescription       | 18,535 | 1.017 (0.997-1.037)   | 0.996 (0.975-1.016)   | 0.989 (0.969-1.009)   |
| 10-year preceding filled prescription      | 18,535 | 1.020 (1.000-1.041)   | 0.997 (0.976-1.018)   | 0.989 (0.969-1.010)   |
| <b>Least exposed façade</b>                |        |                       |                       |                       |
| 1-year preceding filled prescription       | 18,535 | 1.021 (0.997-1.047)   | 1.000 (0.976-1.026)   | 0.998 (0.974-1.024)   |
| 5-year preceding filled prescription       | 18,535 | 1.020 (0.995-1.046)   | 0.998 (0.973-1.023)   | 0.995 (0.971-1.021)   |
| 10-year preceding filled prescription      | 18,535 | 1.021 (0.995-1.047)   | 0.996 (0.971-1.023)   | 0.994 (0.968-1.020)   |

<sup>a</sup> Sex, and calendar year.

<sup>b</sup> As model 1a, and further adjusted for level of education, disposable income, cohabitation, area-level proportion of low income, basic education, and unemployment.

<sup>c</sup> As model 1b, and further adjusted for, smoking status, smoking duration, smoking intensity, alcohol intake, abstainers, sport during leisure time (y/n), sport (hrs/week), vegetable intake, and fruit intake.

**Table S3.** Associations between residential exposure to traffic noise (per 10 dB) and filled prescriptions for antihypertensive medication adjusted for air pollution.

| <b>Exposure to traffic noise (per 10 dB)</b>    | <b>Model 1c<sup>a</sup></b> |                     | <b>Model 2a<sup>b</sup></b> |                     | <b>Model 2b<sup>c</sup></b> |                     |
|-------------------------------------------------|-----------------------------|---------------------|-----------------------------|---------------------|-----------------------------|---------------------|
|                                                 | <b>Cases</b>                | <b>IRR (95% CI)</b> | <b>IRR (95% CI)</b>         | <b>IRR (95% CI)</b> | <b>IRR (95% CI)</b>         | <b>IRR (95% CI)</b> |
| <b>Road traffic noise, most exposed façade</b>  |                             |                     |                             |                     |                             |                     |
| 1-year preceding filled prescription            | 21,241                      | 0.998 (0.980-1.017) | 1.003 (0.984-1.024)         | 1.003 (0.981-1.026) |                             |                     |
| 5-year preceding filled prescription            | 21,241                      | 0.998 (0.979-1.017) | 1.008 (0.987-1.029)         | 0.996 (0.972-1.019) |                             |                     |
| 10-year preceding filled prescription           | 21,241                      | 0.999 (0.980-1.019) | 1.037 (1.015-1.060)         | 1.002 (0.978-1.027) |                             |                     |
| <b>Road traffic noise, least exposed façade</b> |                             |                     |                             |                     |                             |                     |
| 1-year preceding filled prescription            | 21,241                      | 1.003 (0.980-1.026) | 1.005 (0.982-1.029)         | 1.006 (0.982-1.031) |                             |                     |
| 5-year preceding filled prescription            | 21,241                      | 1.001 (0.977-1.025) | 1.005 (0.981-1.029)         | 1.000 (0.976-1.025) |                             |                     |
| 10-year preceding filled prescription           | 21,241                      | 1.001 (0.977-1.026) | 1.014 (0.990-1.039)         | 1.003 (0.978-1.029) |                             |                     |

<sup>a</sup> Adjusted for sex, calendar year, level of education, disposable income, cohabitation, area-level proportion of low income, basic education, and unemployment, smoking status, smoking duration, smoking intensity, alcohol intake, abstainers, sport during leisure time (y/n), sport (hrs/week), vegetable intake, and fruit intake.

<sup>b</sup> As model 1c, and further adjusted for PM<sub>2.5</sub>.

<sup>c</sup> As model 1c, and further adjusted for NO<sub>2</sub>.



**Table S4.** Association between categories of exposure to road traffic ( $L_{den}$ ) at the most exposed façade and filled prescription for antihypertensive medication.

| <b>10-year mean exposure to traffic noise,<br/>most exposed façade</b> | <b>IRR (95% CI)</b> |
|------------------------------------------------------------------------|---------------------|
| <52 dB(A)                                                              | Reference           |
| 52-55 dB(A)                                                            | 0.98 (0.94-1.02)    |
| 55-58 dB(A)                                                            | 1.00 (0.96-1.05)    |
| 58-61 dB(A)                                                            | 0.99 (0.95-1.03)    |
| 61-64 dB(A)                                                            | 0.99 (0.94-1.03)    |
| 64-67 dB(A)                                                            | 0.98 (0.92-1.03)    |
| 67-70 dB(A)                                                            | 0.99 (0.93-1.06)    |
| $\geq 70$ dB(A)                                                        | 1.06 (0.98-1.14)    |

Adjusted for sex, calendar year, level of education, disposable income, cohabitation, area-level proportion of low income, basic education and unemployment, smoking status, smoking duration, smoking intensity, alcohol intake, abstainers, sport during leisure time (y/n), sport (hrs/week), vegetables intake, and fruit intake.

**Table S5.** Association between categories of exposure to road traffic ( $L_{den}$ ) at the least exposed façade and filled prescriptions for antihypertensive medication.

| <b>10-year mean exposure to traffic noise,<br/>least exposed façade</b> | <b>IRR (95% CI)</b> |
|-------------------------------------------------------------------------|---------------------|
| <45 dB(A)                                                               | Reference           |
| 45-48 dB(A)                                                             | 0.97 (0.93-1.01)    |
| 48-51 dB(A)                                                             | 0.97 (0.93-1.01)    |
| 51-54 dB(A)                                                             | 1.01 (0.97-1.06)    |
| 54-57 dB(A)                                                             | 0.97 (0.93-1.02)    |
| 57-60 dB(A)                                                             | 1.00 (0.94-1.07)    |
| 60-63 dB(A)                                                             | 1.03 (0.93-1.14)    |
| ≥63 dB(A)                                                               | 1.01 (0.87-1.18)    |

Adjusted for sex, calendar year, level of education, disposable income, cohabitation, area-level proportion of low income, basic education and unemployment, smoking status, smoking duration, smoking intensity, alcohol intake, abstainers, sport during leisure time (y/n), sport (hrs/week), vegetables intake, and fruit intake.

**Figure S3.** Distribution of residential exposure to road traffic ( $L_{den}$ ) at baseline.

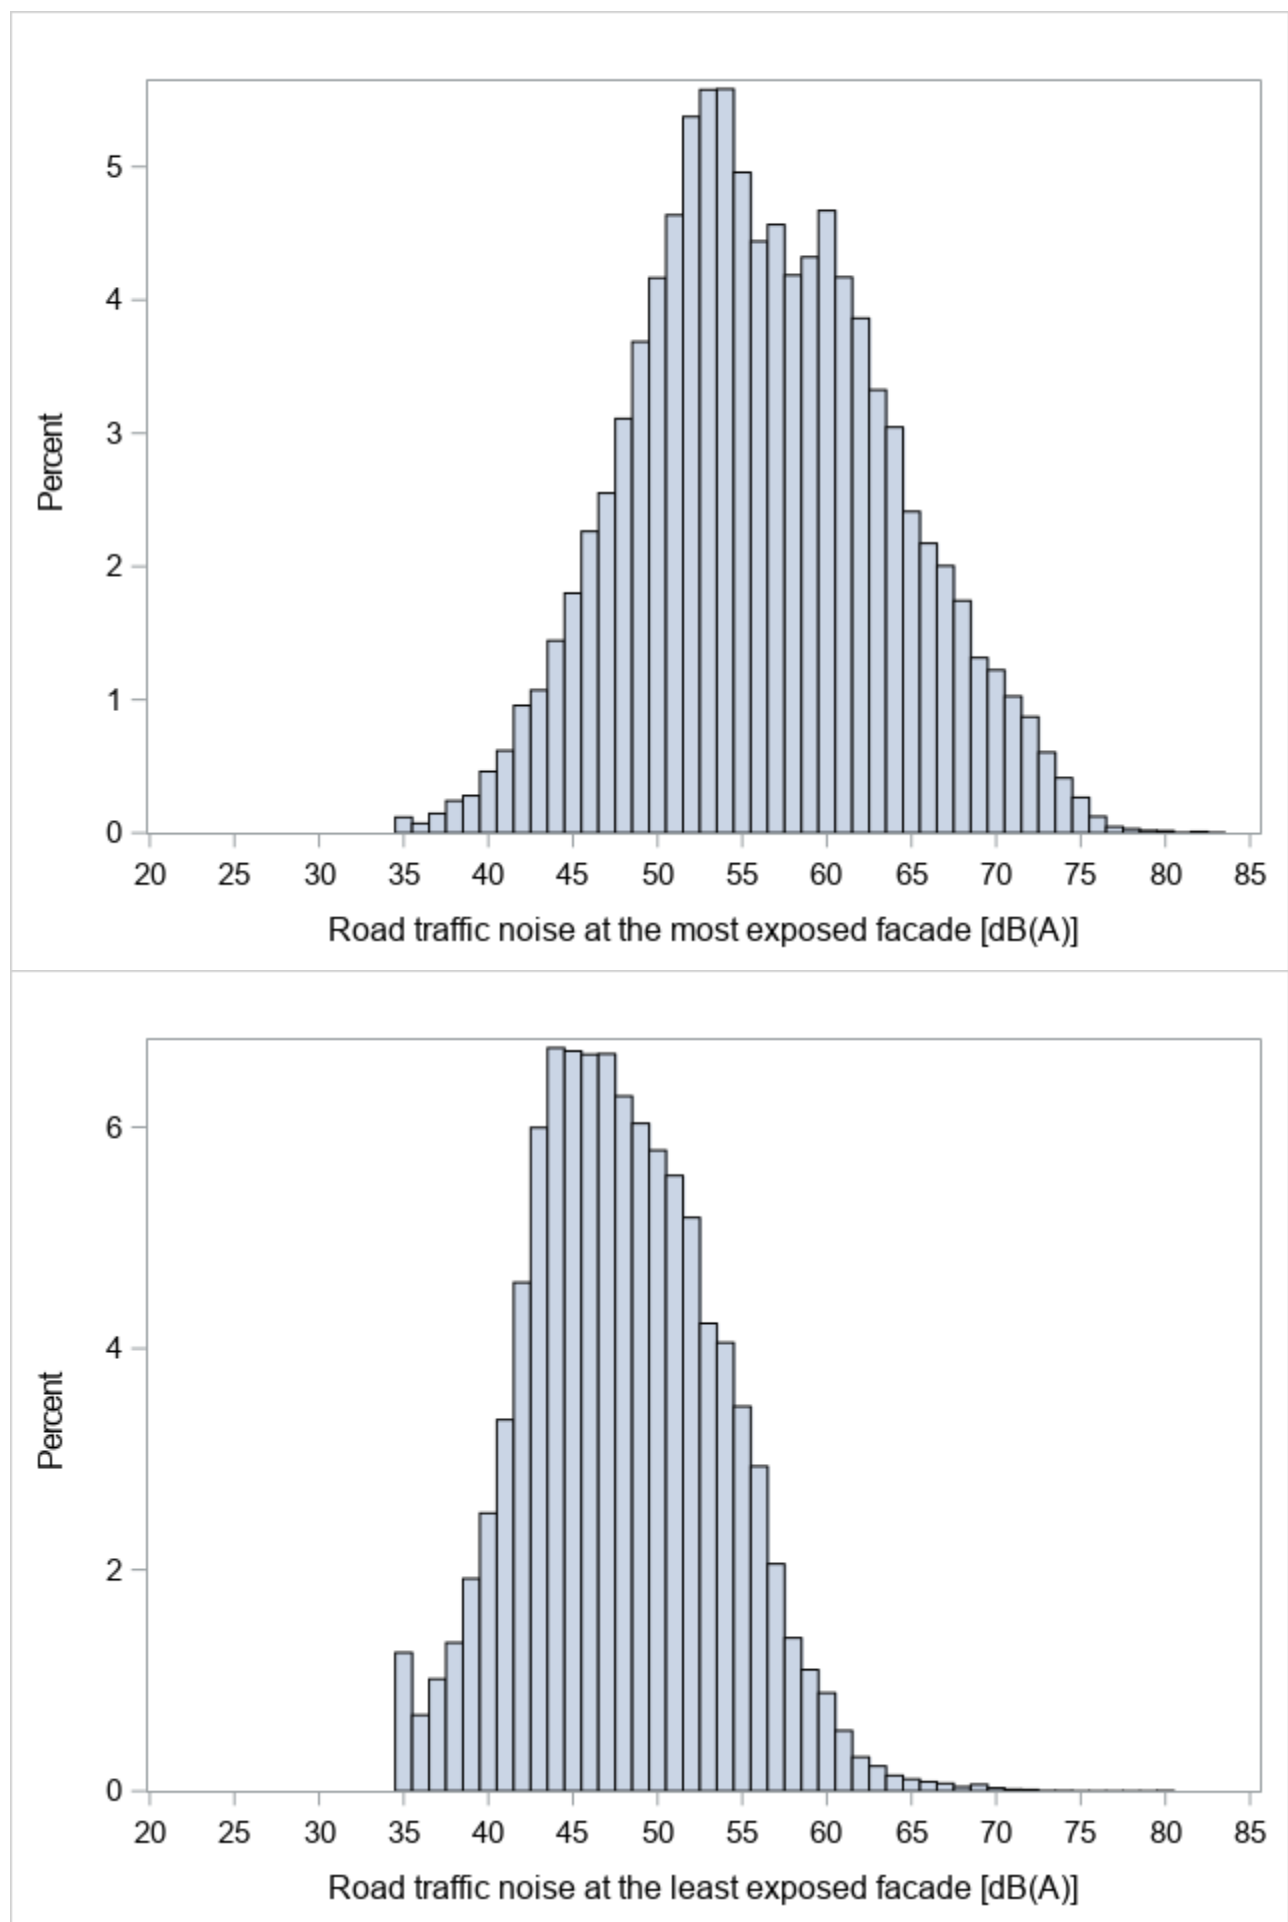

Supplement: ehp6273.s001.acco.pdf [file ehp6273.s001.acco.pdf]
