# Supplementary material
Source: PubMed Central journal article supplement (PMC7263450)
Supplement: ehp6273.smcontents.508.pdf [file ehp6273.smcontents.508.pdf]

**Note to readers with disabilities:** *EHP* strives to ensure that all journal content is accessible to all readers. However, some figures and Supplemental Material published in *EHP* articles may not conform to [508 standards](#) due to the complexity of the information being presented. If you need assistance accessing journal content, please contact [ehp508@niehs.nih.gov](mailto:ehp508@niehs.nih.gov). Our staff will work with you to assess and meet your accessibility needs within 3 working days.

### **Supplemental Material**

#### **Road Traffic Noise Exposure and Filled Prescriptions for Antihypertensive Medication: A Danish Cohort Study**

Jesse D. Thacher, Aslak H. Poulsen, Nina Roswall, Ulla Hvidtfeldt, Ole Raaschou-Nielsen, Steen Solvang Jensen, Matthias Ketzel, Jørgen Brandt, Kim Overvad, Anne Tjønneland, Thomas Münzel, and Mette Sørensen

#### **Table of Contents**

**Figure S1.** Graphical evaluation of estimated exposure-response curves (solid lines) with 95% confidence intervals (dashed lines) for exposures and selected covariates.

**Figure S2.** Study Population.

**Table S1.** Correlation matrix of road traffic noise and air pollution.

**Table S2.** Associations between residential exposure to traffic noise (per 10 dB) and filled prescriptions for antihypertensive medication (excluding diuretics).

**Table S3.** Associations between residential exposure to traffic noise (per 10 dB) and filled prescriptions for antihypertensive medication adjusted for air pollution.

**Table S4.** Association between categories of exposure to road traffic ( $L_{den}$ ) at the most exposed façade and filled prescription for antihypertensive medication.

**Table S5.** Association between categories of exposure to road traffic ( $L_{den}$ ) at the least exposed façade and filled prescriptions for antihypertensive medication.

**Figure S3.** Distribution of residential exposure to road traffic ( $L_{den}$ ) at baseline.
